# Supplementary material for: A portable solid-state potentiometric sensor based on a polymeric ion-exchanger for the assay of a controversial food colorant (sunset yellow)
Source: Royal Society of Chemistry journal article supplement (doi:10.1039/d1ay01212f), 2021-01-01
Supplement: d1ay01212f1.pdf [file d1ay01212f1.pdf]

## Electronic Supplementary Information for

### Portable sensor based on polymeric ion-exchanger for the assay of the controversial colorant (sunset yellow) in soft drink and pharmaceutical products

Manar Omar Heragy<sup>1</sup>, Azza Aziz M. Moustafa<sup>2</sup>, Eman Saad Elzanfaly<sup>2,3</sup>, Ahmed  
Sayed Saad<sup>2,4,5\*</sup>

<sup>1</sup> Chemistry Department, Faculty of Pharmacy, October 6 University, 6 October City, 12585,  
Giza, Egypt.

<sup>2</sup> Analytical Chemistry Department, Faculty of Pharmacy, Cairo University, Kasr-El Aini Street,  
11562, Cairo, Egypt.

<sup>3</sup> Chemistry Department, Faculty of Pharmacy and Drug Technology, Egyptian Chinese  
University, Gisar Alsuez, Cairo, Egypt.

<sup>4</sup> Egypt-Japan University of Science and Technology (E-JUST), New Borg El-Arab City, 21934  
Alexandria, Egypt.

<sup>5</sup> Pharmaceutical Chemistry Department, School of Pharmacy and Pharmaceutical Industries,  
Badr University in Cairo (BUC), Badr City, 11829, Cairo, Egypt.

\*Corresponding author

Email: [ahmedss\\_pharm@yahoo.com](mailto:ahmedss_pharm@yahoo.com); [ahmed.bayoumy@pharma.cu.edu.eg](mailto:ahmed.bayoumy@pharma.cu.edu.eg)

Telephone No.: 00201004009443

**Supplementary information S1.** Derivation of the standard addition equation (equation 1).

Equation 2 was derived from Nernst equation as following:

- The measured potential in the sample solution of unknown concentration  $C_u$  and known volume  $V_s$ .

$$E_1 = K + m \log C_{s(M)} \quad \text{Equation 1}$$

Where (K) is the intercept, ( $m$ ) is the slope and ( $C_{s(M)}$ ) is the analyte molar concentration.

- The measured potential in the sample solution after addition of known volume  $V_{std}$  of standard SSY solution of molar concentration  $C_{std(M)}$ .

$$E_2 = K + m \log \frac{C_{s(M)} V_s + C_{std(M)} V_{std}}{V_t}$$

Equation 2

- $V_t$  is the total volume of the sample ( $V_s$ ) and the added standard ( $V_{std}$ ) solutions.

$$\Delta E = E_2 - E_1 = m \log \frac{C_{s(M)} V_s + C_{std(M)} V_{std}}{V_t} - m \log C_{s(M)} \quad \text{Equation 3}$$

$$\Delta E = E_2 - E_1 = m \log \frac{C_{s(M)} V_s + C_{std(M)} V_{std}}{C_{s(M)} V_t} \quad \text{Equation 4}$$

$$10^{(\Delta E / m)} = \frac{C_{s(M)} V_s + C_{std(M)} V_{std}}{C_{s(M)} V_t} \quad \text{Equation 5}$$

$$[C_{s(M)} V_t \times 10^{(\Delta E/m)}] - C_{s(M)} V_s = C_{std(M)} V_{std}$$

Equation 6

$$C_{s(M)} [V_t \times 10^{(\Delta E/m)} - V_s] = C_{std(M)} V_{std}$$

Equation 7

$$C_{s(M)} = \frac{C_{std(M)} V_{std}}{[V_t \times 10^{(\Delta E/m)} - V_s]}$$

Equation

8

$$C_{s(g/L)} = \frac{C_{std(M)} V_{std}}{[V_t \times 10^{(\Delta E/m)} - V_s]} \times Mwt$$

Equation 9

$$C_{s(ppm)} = \frac{C_{std(M)} V_{std}}{[V_t \times 10^{(\Delta E/m)} - V_s]} \times Mwt \times 1000$$

Equation 10

To find the concentration (ppm) in the original sample:

$$C_s(ppm) = \frac{C_{std(M)} V_{std}}{[V_t \times 10^{(\Delta E/m)} - V_s]} \times Mwt \times 1000 \times 10$$

Equation 11

$$\text{For sunset yellow: } \frac{452.36 \times 10^4 \times C_{std} V_{std}}{[(V_t \times 10^{\Delta E/m}) - V_s]}$$

Equation 12

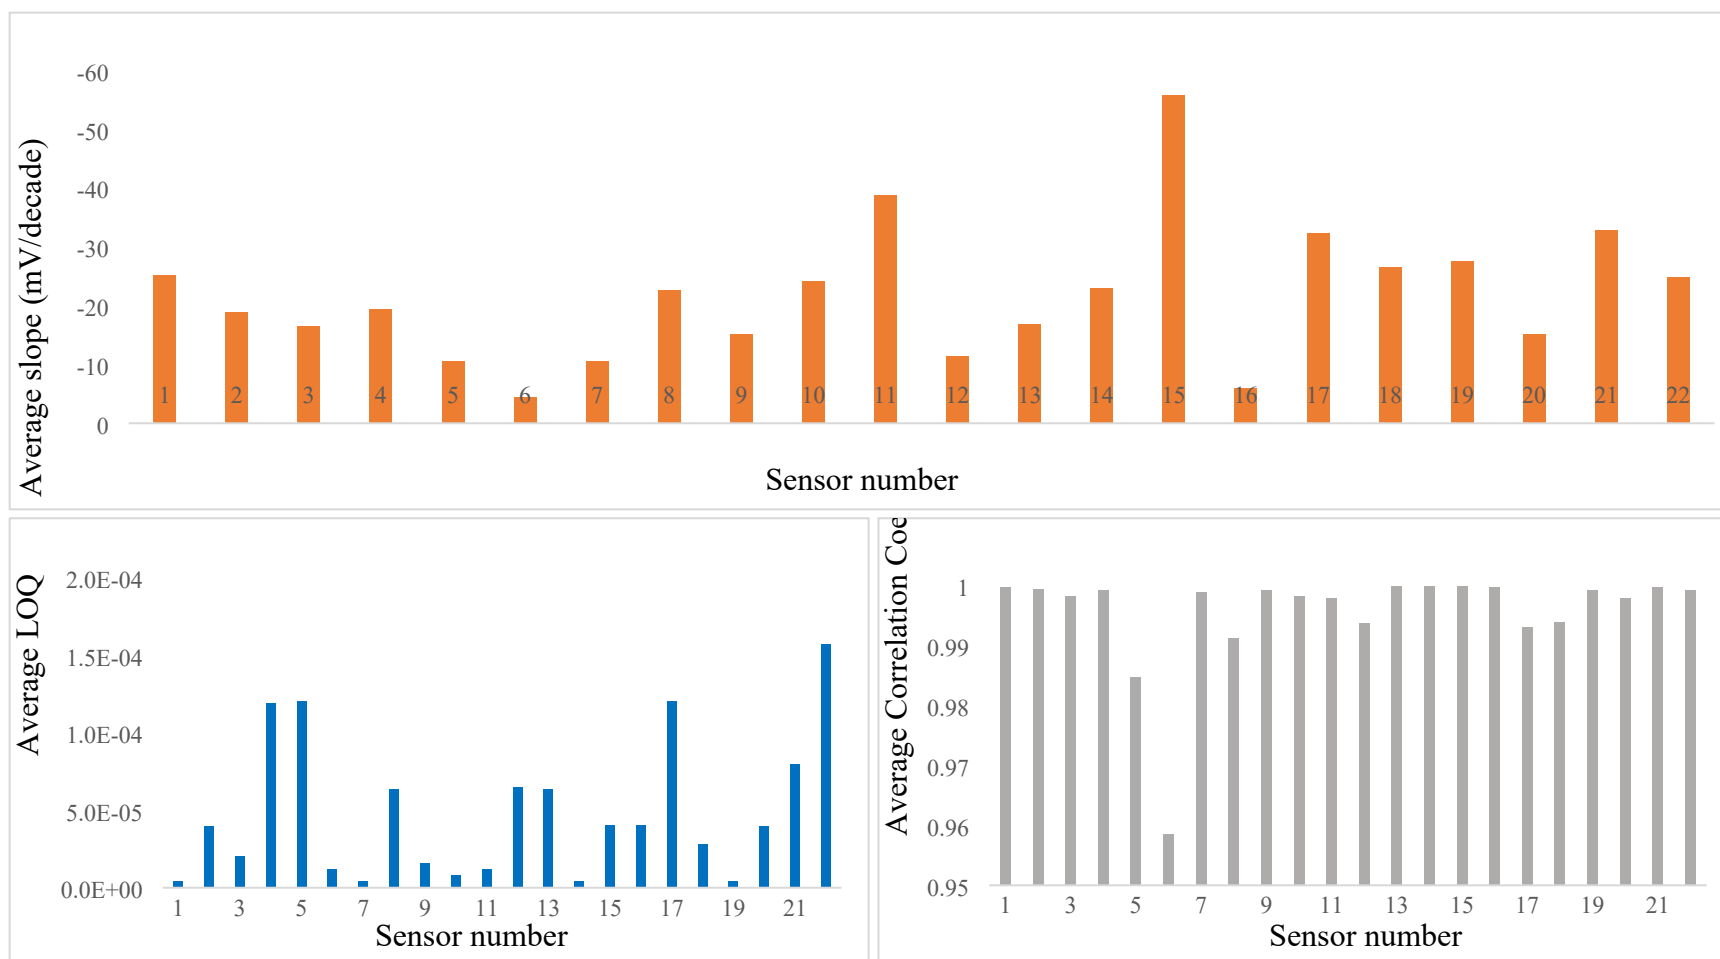

**Fig. S1** The pooled data of the investigated sensors showing the average response parameters (slope, LOQ, and correlation coefficient ( $r$ )) for the 22 studied sensors during the optimization study ( $n=3$ ).

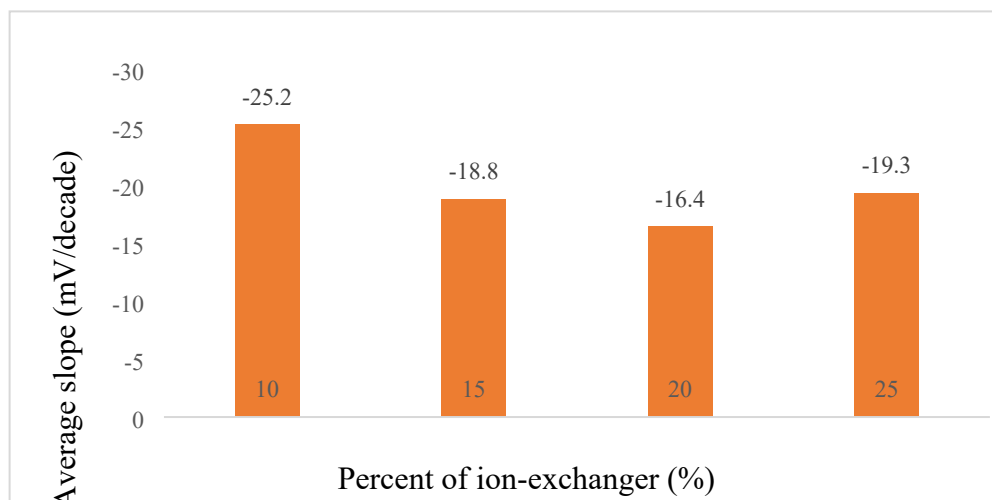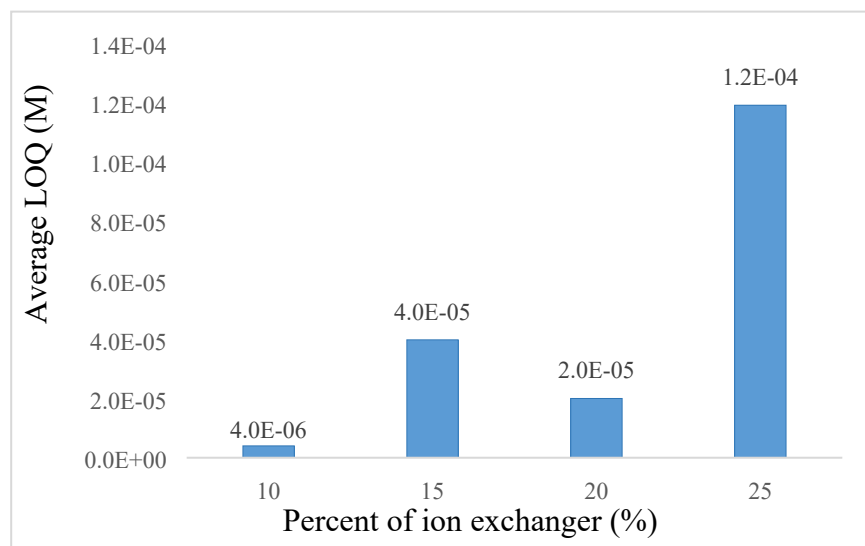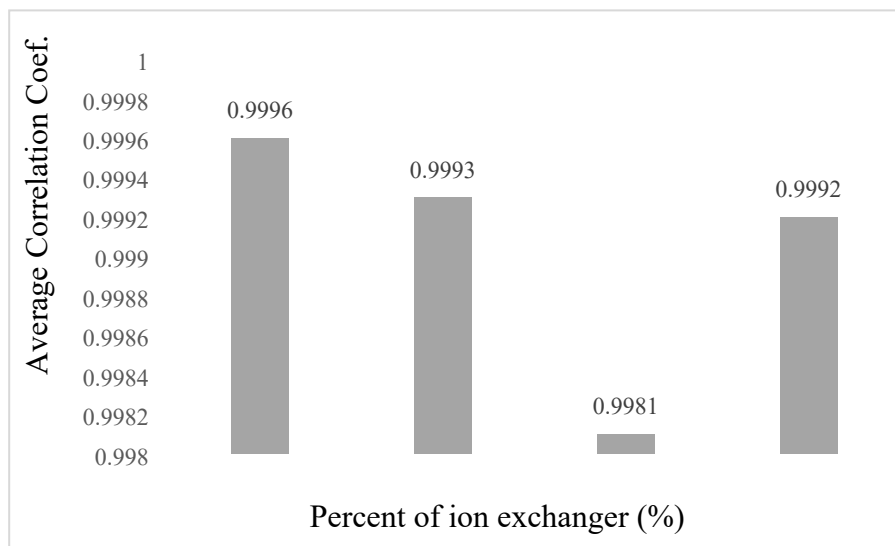

**Fig. S2** The average slope, LOQ, and correlation coefficient (r) obtained using different percentages of the polymeric ion-exchanger (n=3).

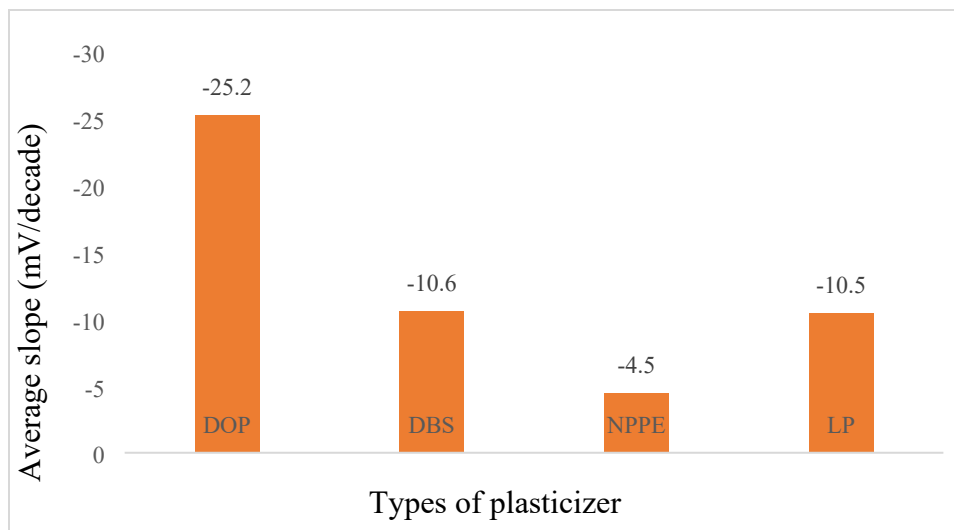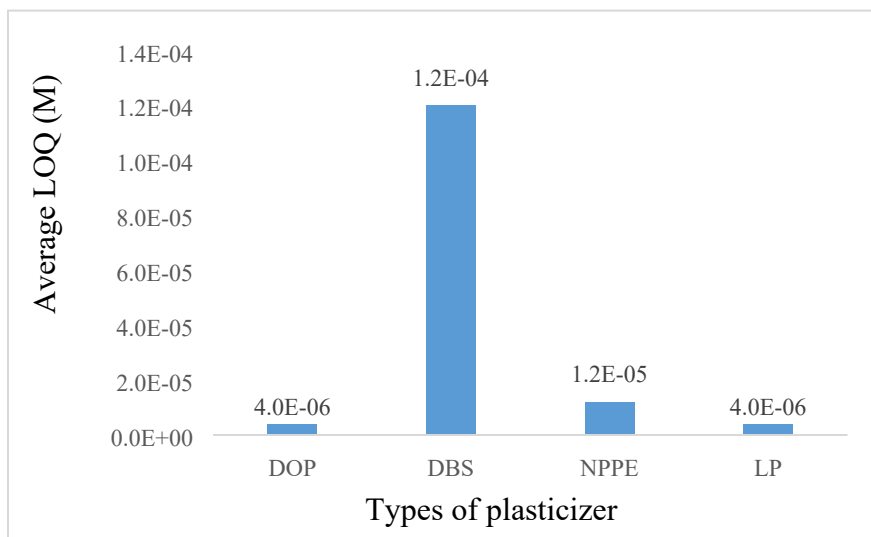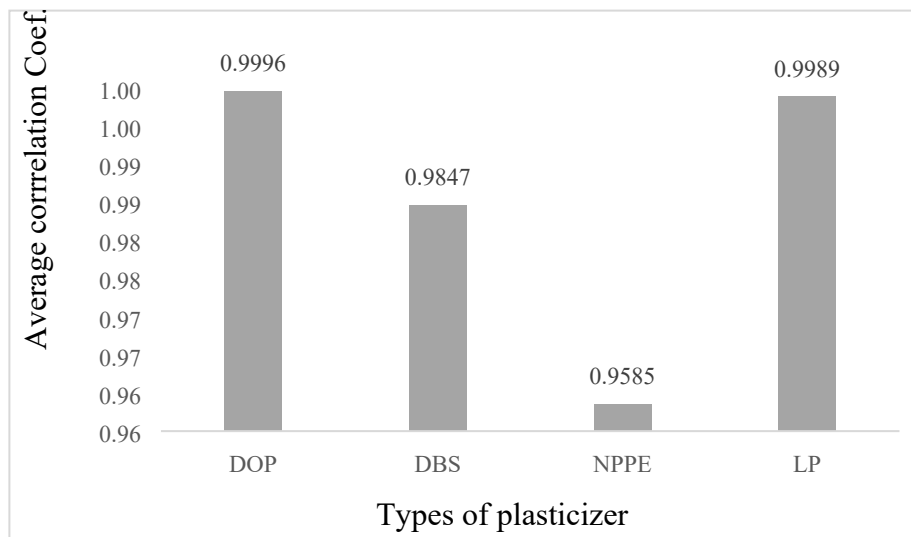

**Fig. S3** The average slope, LOQ, and correlation coefficient (r) obtained using different plasticizers (n=3): dioctyl phthalate (DOP), dibutyl sebacate (DBS), nitrophenyl phenyl ether (NPPE), liquid paraffin (LP).

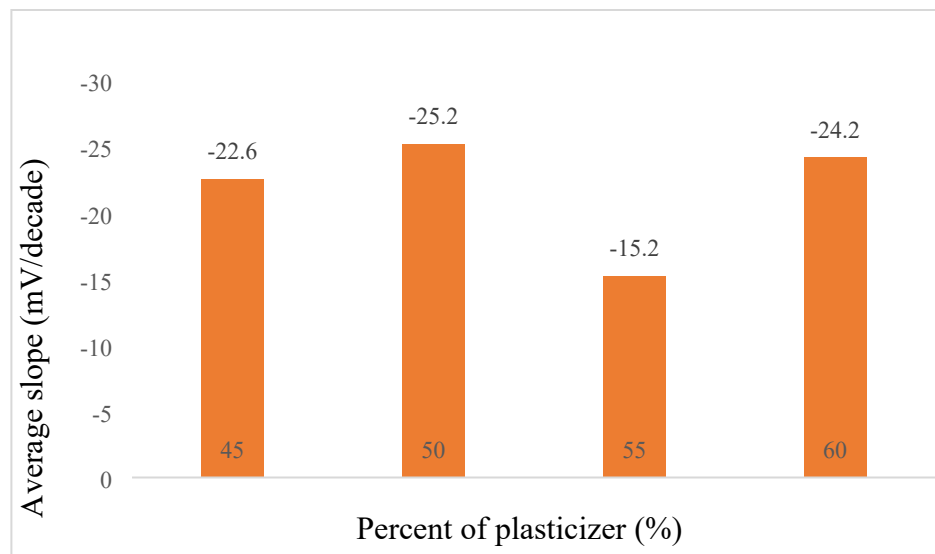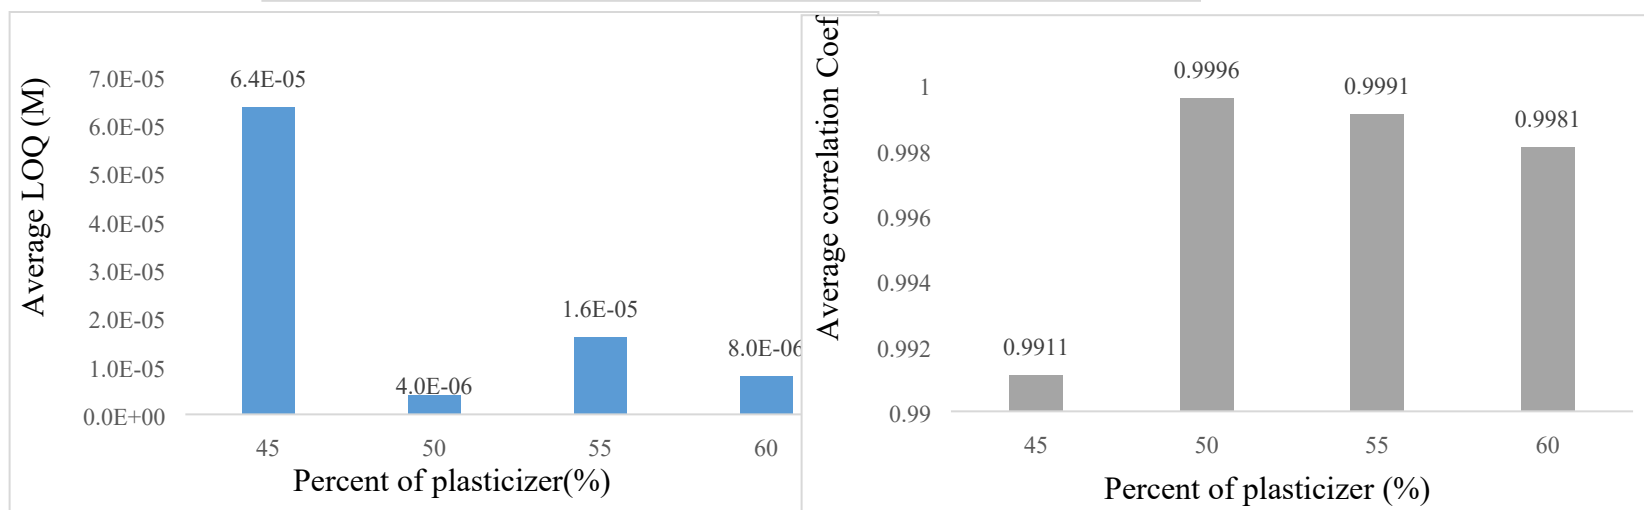

**Fig. S4** The average slope, LOQ, and correlation coefficient ( $r$ ) obtained using different percentages of dioctyl phthalate plasticizer ( $n=3$ ).

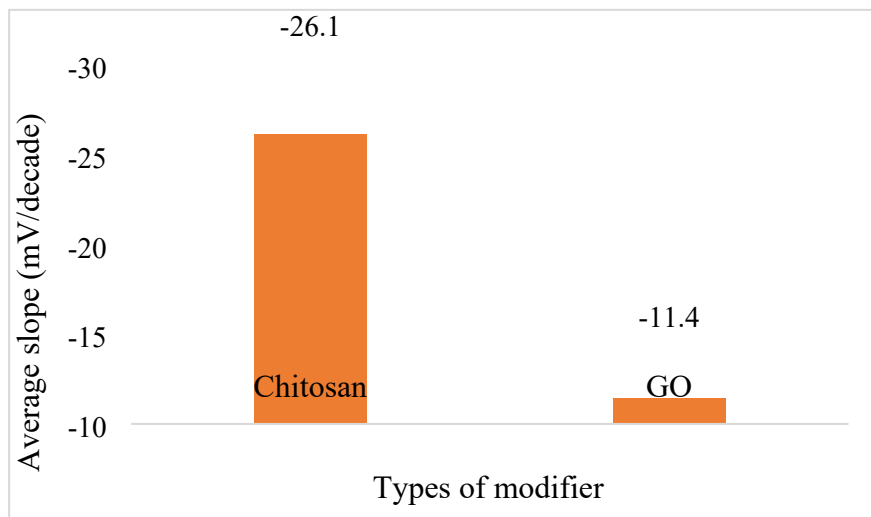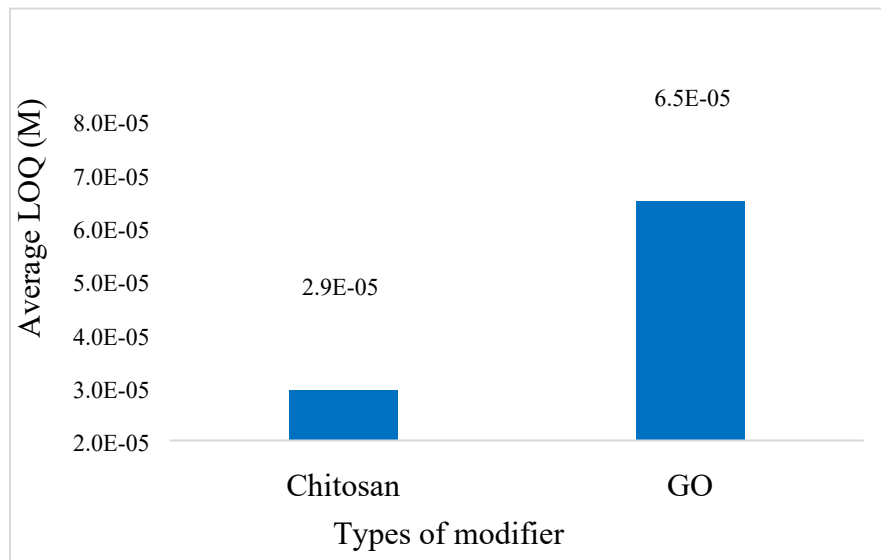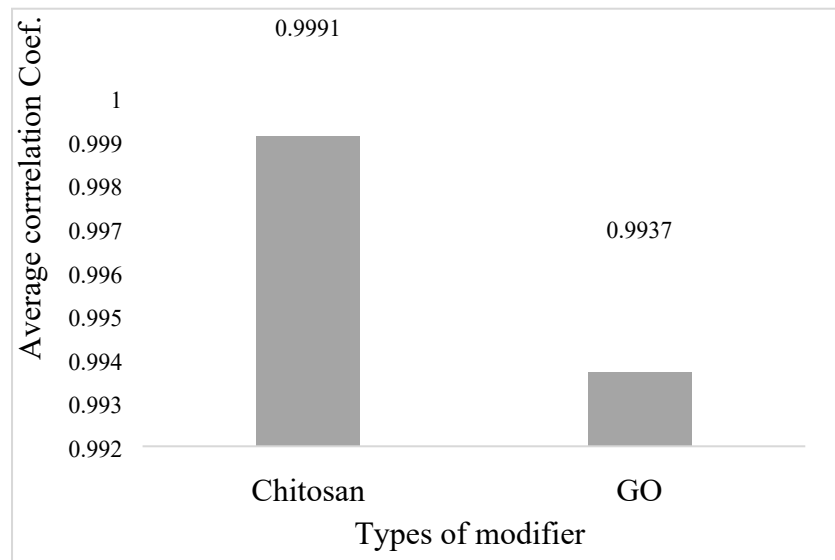

**Fig. S5** The average slope, LOQ, and correlation coefficient (r) obtained using chitosan and Graphene oxide (GO) as carbon paste modifiers (n=3).



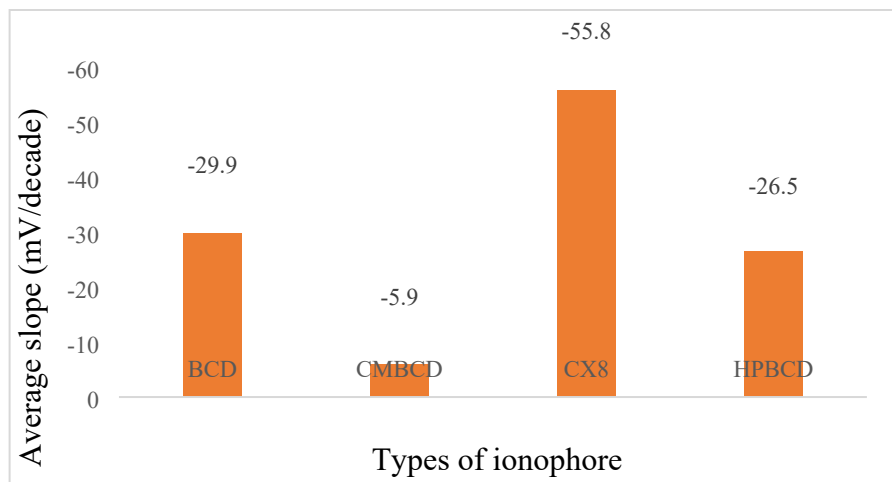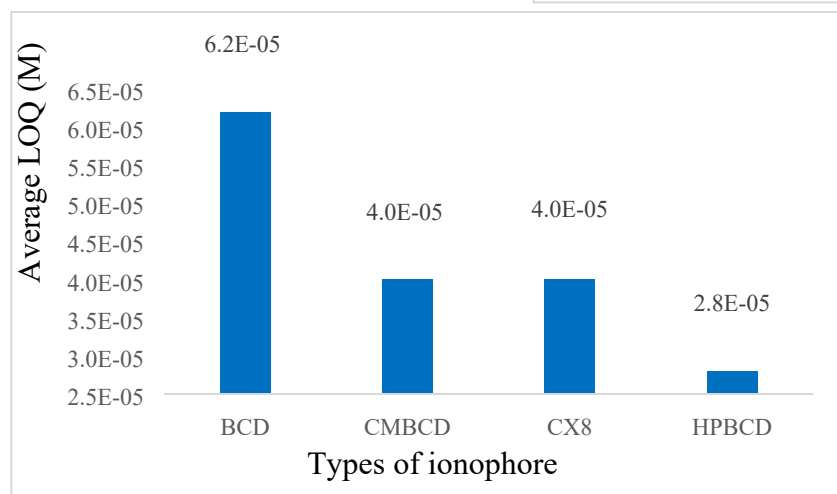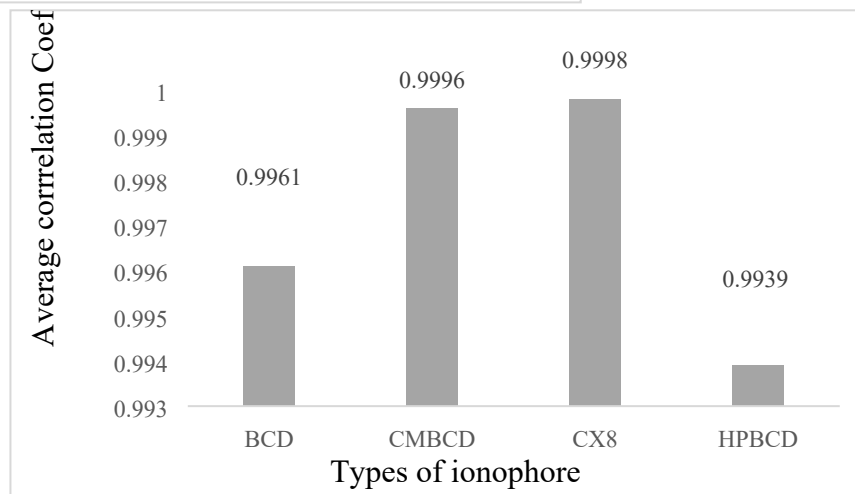

**Fig. S6** The average slope, LOQ, and correlation coefficient (r) obtained using different ionophores:  $\beta$ -cyclodextrin (BCD), carboxymethyl- $\beta$ -cyclodextrin (CMBCD), calix-[8]-arene (CX8), hydroxypropyl- $\beta$ -cyclodextrin (HPBCD) (n=3).

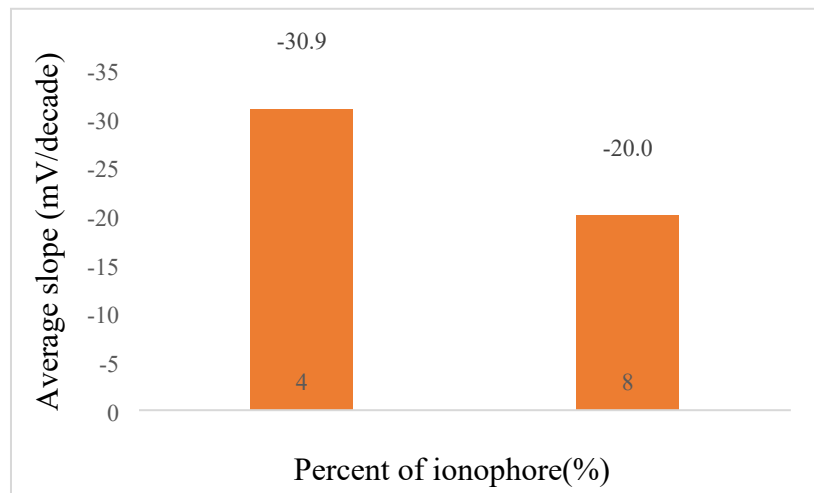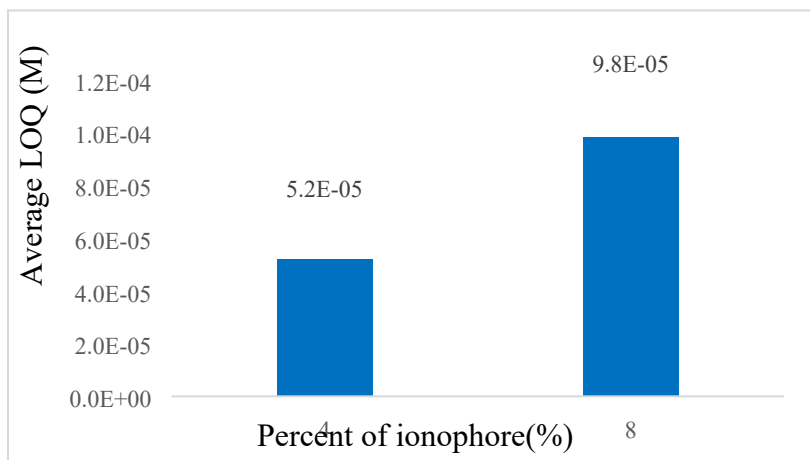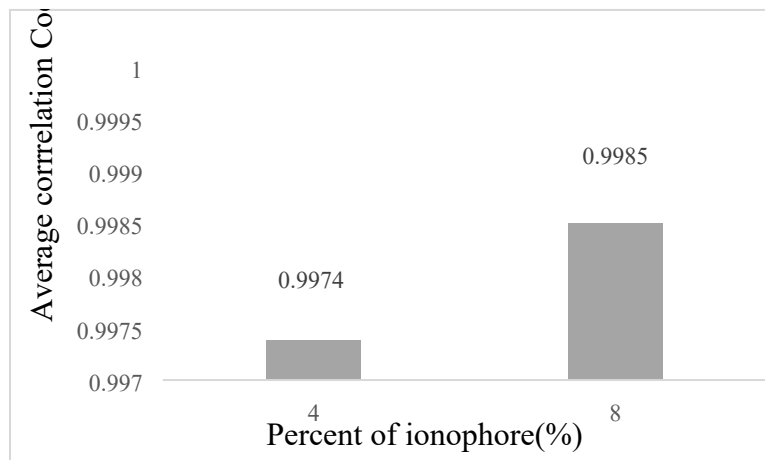

**Fig. S7** The average slope, LOQ, and correlation coefficient (r) obtained using different percentages of Calix-8-arene (CX8) (n=3).
